# Supplementary material
Source: MDPI journal article supplement (https://www.mdpi.com/2073-4395/13/3/684)
Supplement: s1 [file s1]

Figure S6. Visualization of AgriGO2 terms significantly down- or up-regulated between the transcriptomes of potato leaves (30 dpi versus 14 dpi). The colour intensity corresponds to the significance level. The cells also contains information on number of DEGs in the current comparison related to the GO terms (cell “translation” as example: 138/2401) as well as total number of genes in the database associated with the GO term related to total number of *Solanum tuberosum* genes in the database (cell “translation” as example: 413/13658)

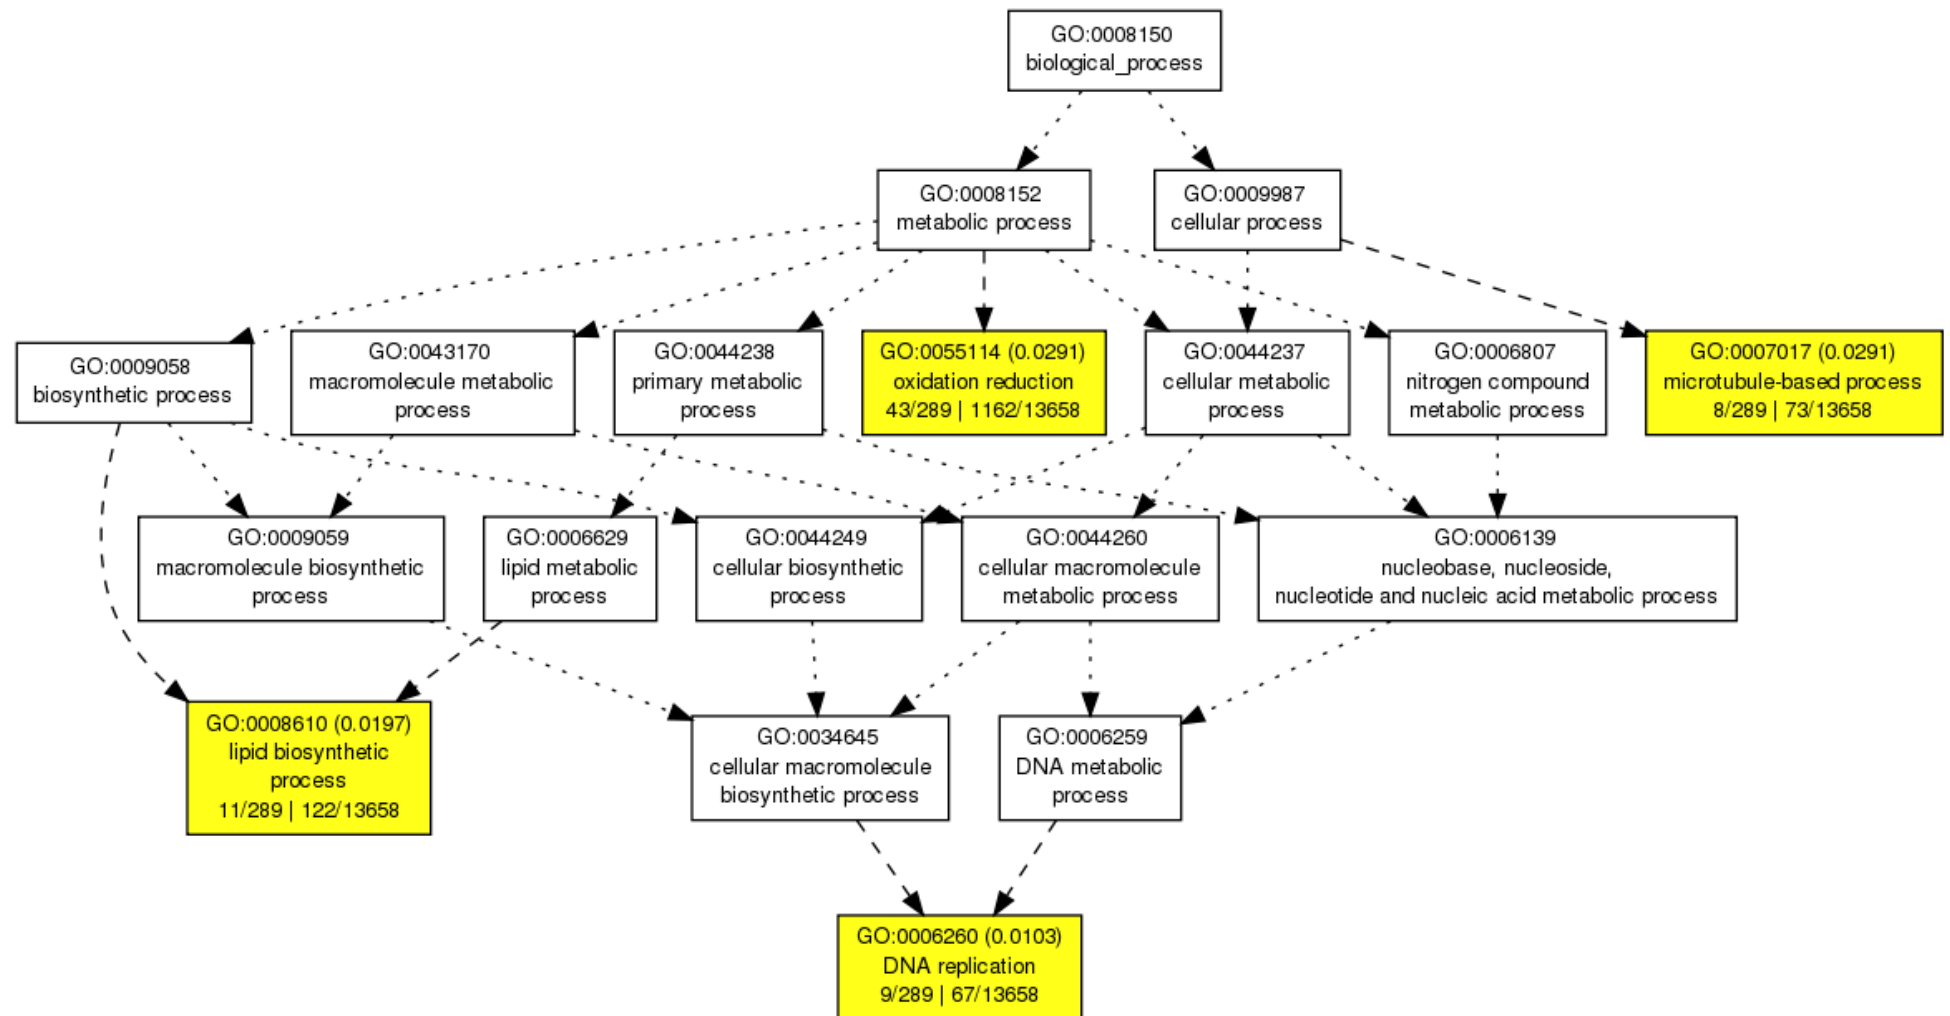

Figure S6. (A) Division “Biological Process”, downregulated GO terms

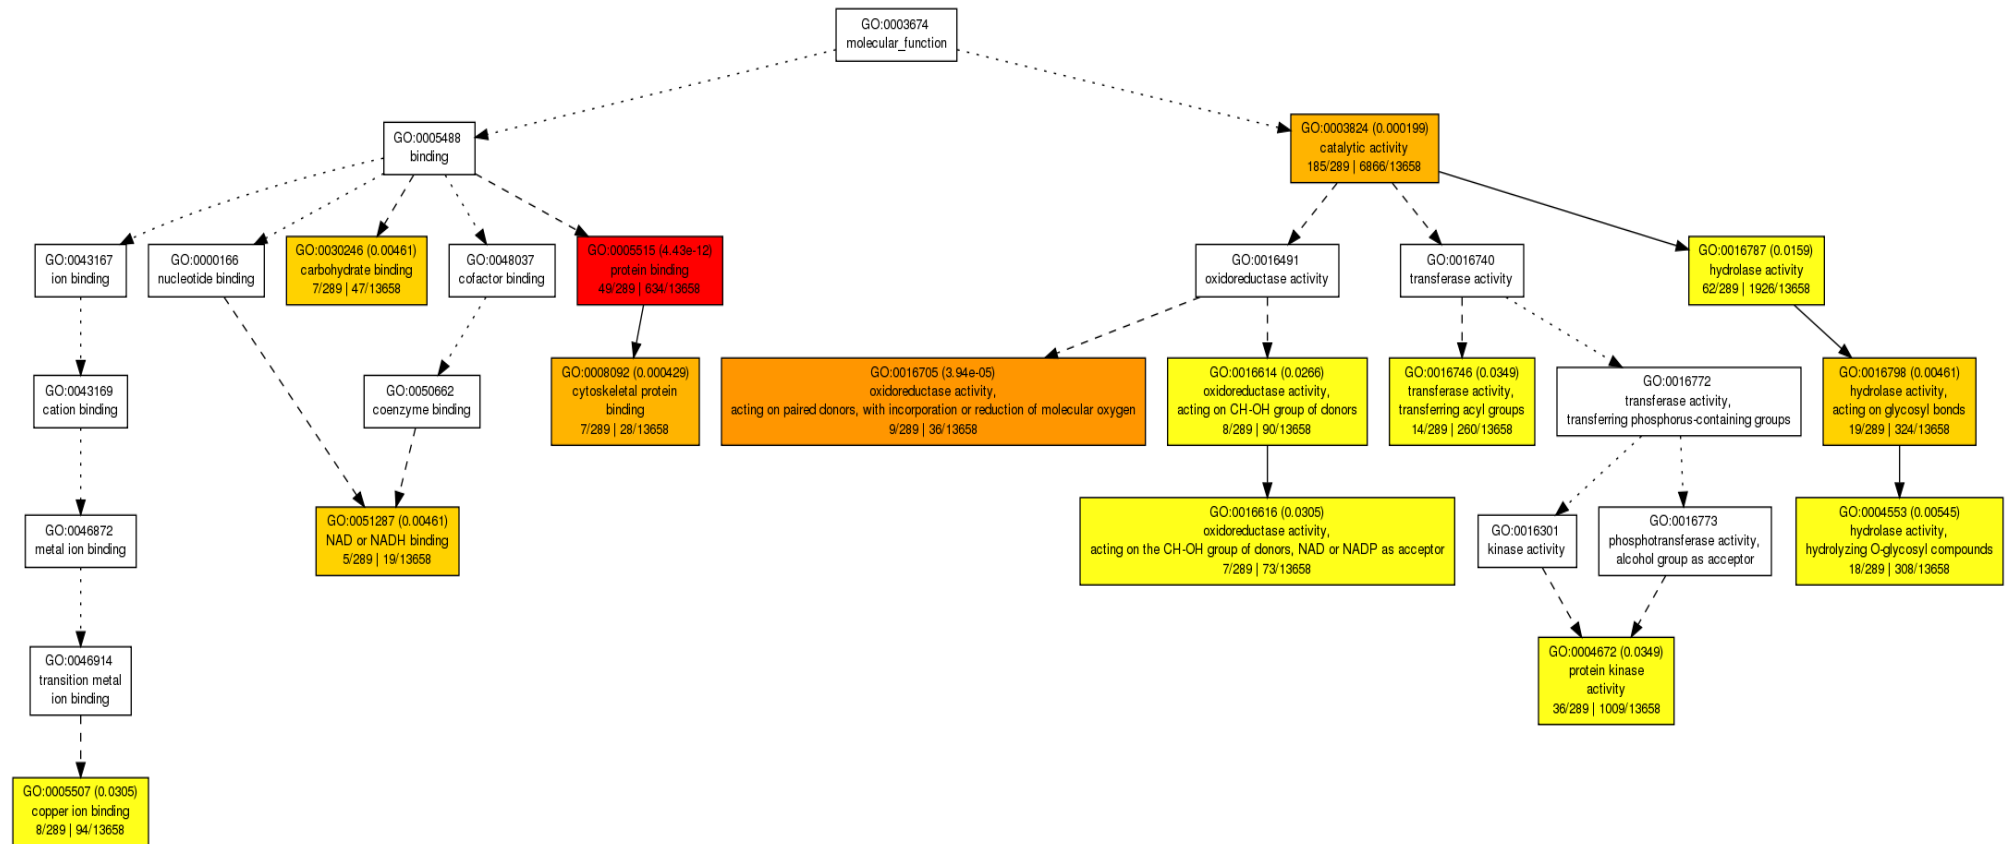

Figure S6. (B) Division “Molecular Function”, downregulated GO terms

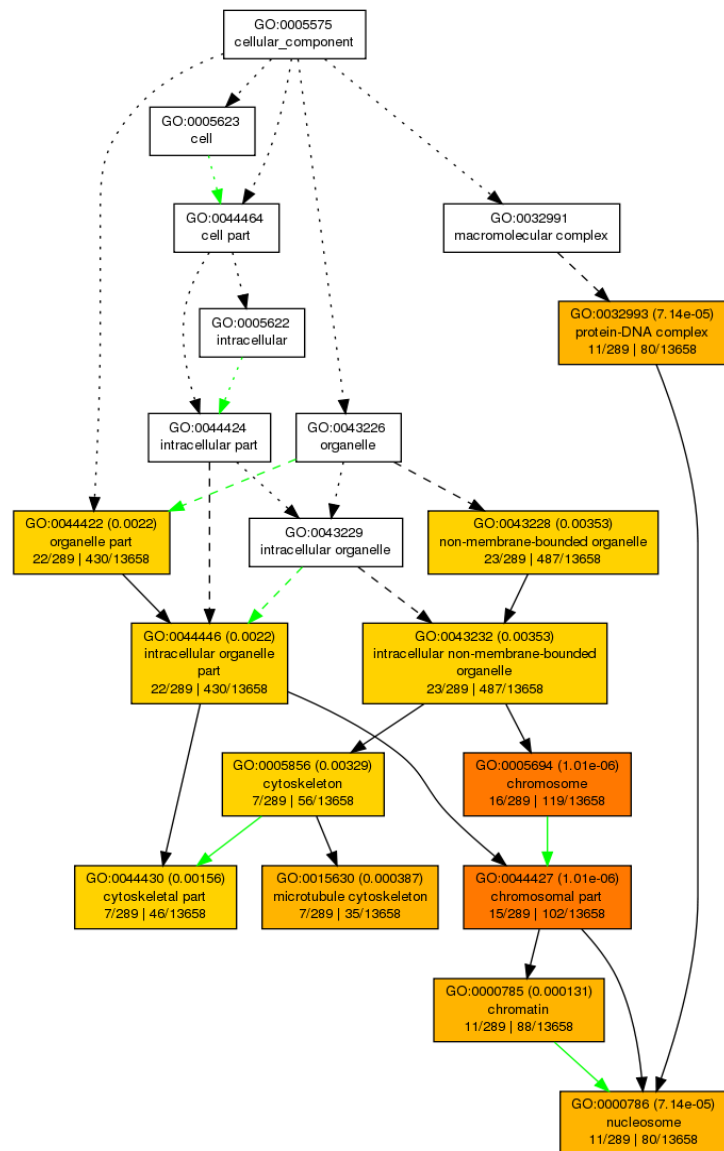

Figure S6. (C) Division “Cellular Component”, downregulated GO terms
