# Supplementary material
Source: MDPI journal article supplement (https://www.mdpi.com/2073-4395/13/3/684)
Supplement: s1 [file s1]

A

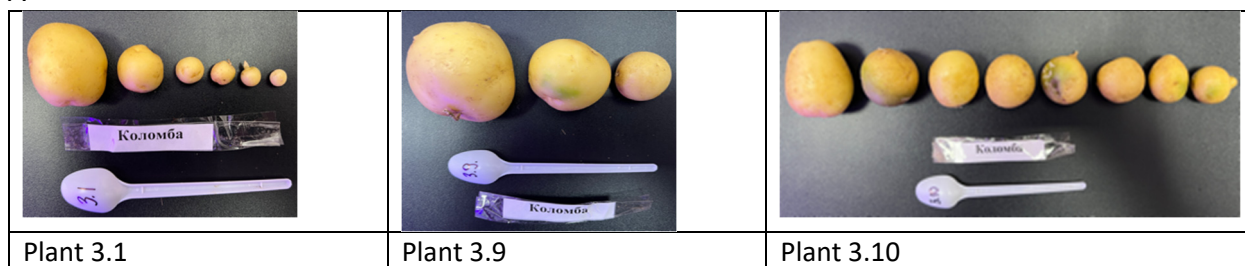

B

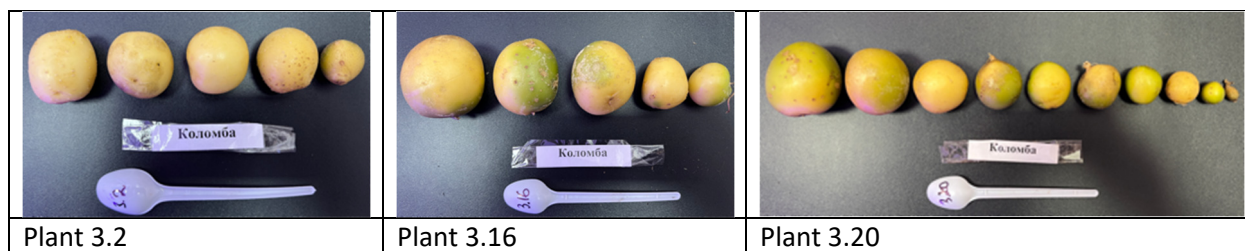

**Figure S4.** Tubers of potato plants of cv. Colomba: A – after inoculation with PSTVd-infected (strain NicTr-3) tomato sap; B – mock; 3.1, 3.2, 3.9, 3.10, 3.16, 3.20 – individual plant.
