# Supplementary material
Source: MDPI journal article supplement (https://www.mdpi.com/2073-4395/13/3/684)
Supplement: s1 [file s1]

Supplementary Table S1.

A. The description of gene-specific primers used for cDNA (qRT-PCR) amplifications

| ID                   | PCR product (bp) | Forward primer (5'→3')   | Reverse primer (5'→3')  | T, °C |
|----------------------|------------------|--------------------------|-------------------------|-------|
| PGSC0003DMG400025030 | 163              | CCTTCCTCGTGAGCAAGTTAATA  | AACTCCGTACTCAGCCAAAC    | 60    |
| PGSC0003DMG400001969 | 108              | GCCGAAAGTAATAGGGATAGCA   | TCACCACCATAGCAACCTTC    | 60    |
| PGSC0003DMG400004038 | 101              | TACGAAGAAACAGAGGATGATGAG | GCTGACAATGCTCCATATGAAAT | 60    |
| PGSC0003DMG400004796 | 102              | CCCTTACCCGAACCCAAAC      | ATCGGACCGTTAAGTACATTGG  | 60    |
| PGSC0003DMG400005111 | 148              | TGTCAAGCGGGTAAAGTATGT    | GACGTTGCTCTCCAGTTAC     | 60    |
| PGSC0003DMG400021008 | 149              | GGTCCACACAACATGAGAA      | AGGCCACGCGCAATATC       | 60    |
| PGSC0003DMG400030968 | 125              | CCGTCAAATCGGCGATTAC      | GAGGCATAGGATGGAGTCGC    | 60    |
| PGSC0003DMG401016475 | 129              | GGTCTGAGAATTGGTCAAGGAG   | GACCTCTAGCTTTGCCACAA    | 60    |

B. DEGs selected for qPCR verification\*

| ID                   | Description                                       | Log(FC) | FDR         |
|----------------------|---------------------------------------------------|---------|-------------|
| PGSC0003DMG400004796 | Extensin                                          | -11,98  | 0,005180282 |
| PGSC0003DMG400025030 | Receptor kinase THESEUS 1                         | -3,52   | 0,001914105 |
| PGSC0003DMG400021008 | LRR receptor-like serine/threonine-protein kinase | -3,15   | 0,002290073 |
| PGSC0003DMG400030968 | Minichromosome maintenance 4 protein              | -3,03   | 0,003211092 |
| PGSC0003DMG401016475 | Multicopper oxidase                               | -4,70   | 0,002536096 |
| PGSC0003DMG400001969 | Carotenoid cleavage dioxygenase 4                 | 4,69    | 0,001914105 |
| PGSC0003DMG400005111 | PR1 protein                                       | 9,33    | 0,020853641 |
| PGSC0003DMG400004038 | Rapid alkalization factor 3                       | -10,02  | 0,002307540 |

Log(FC), base 2 logarithm of expression value change; FDR, false discovery rate.
