# Supplementary material
Source: MDPI journal article supplement (https://www.mdpi.com/2073-4395/13/3/684)
Supplement: s1 [file s1]

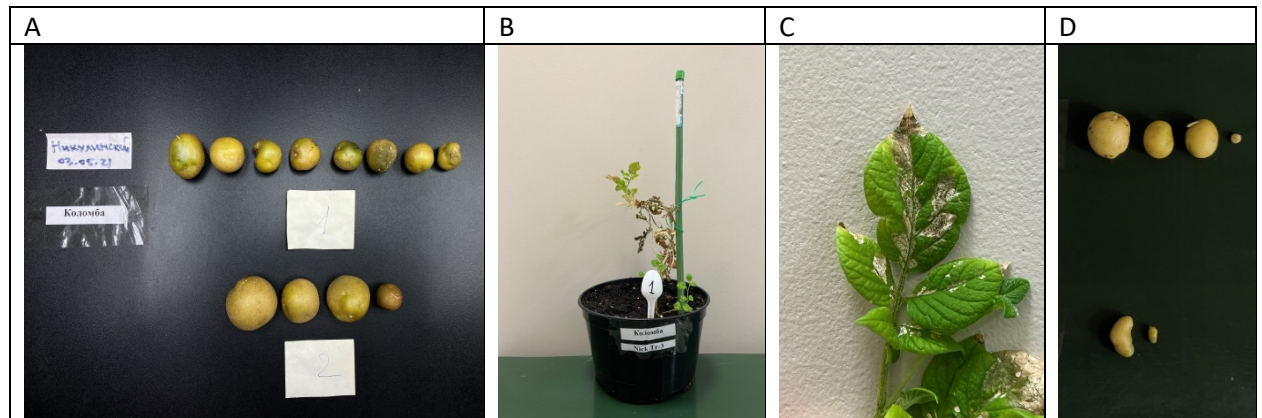

**Figure S2.** Symptoms of plants of cv. Colomba infected with original PSTVd strain NicTr-3: A, tubers after the first inoculation; B and C, second generation plant derived from PSTVd-infected tubers; D, second generation tubers (top row – mock).
