# Supplementary material
Source: MDPI journal article supplement (https://www.mdpi.com/2073-4395/13/3/684)
Supplement: s1 [file s1]

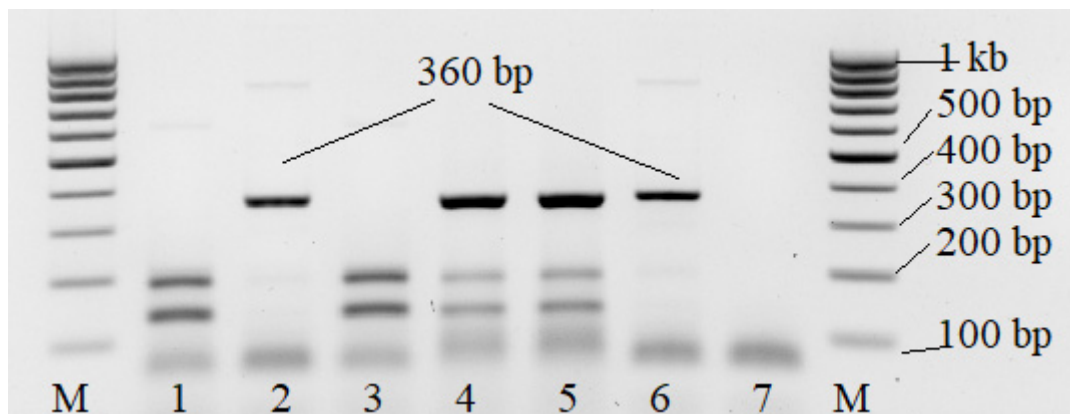

**Figure S3.** RT-PCR detection of PSTVd in potato leaves of cv. Colomba (plant number 3.9): 1 - negative control (mock- inoculation), 2, 6 - positive control, sap of tomato leaf infected with strain NicTr-3, 3 – potato leaf before infection; 4 - 14 dpi; 5 - 30 dpi; 7 - negative control (distilled water); M - markers of molecular weights 100 bp (Gene Ruller, Fermentas).
