# Supplementary material
Source: MDPI journal article supplement (https://www.mdpi.com/2073-4395/13/3/684)
Supplement: s1 [file s1]

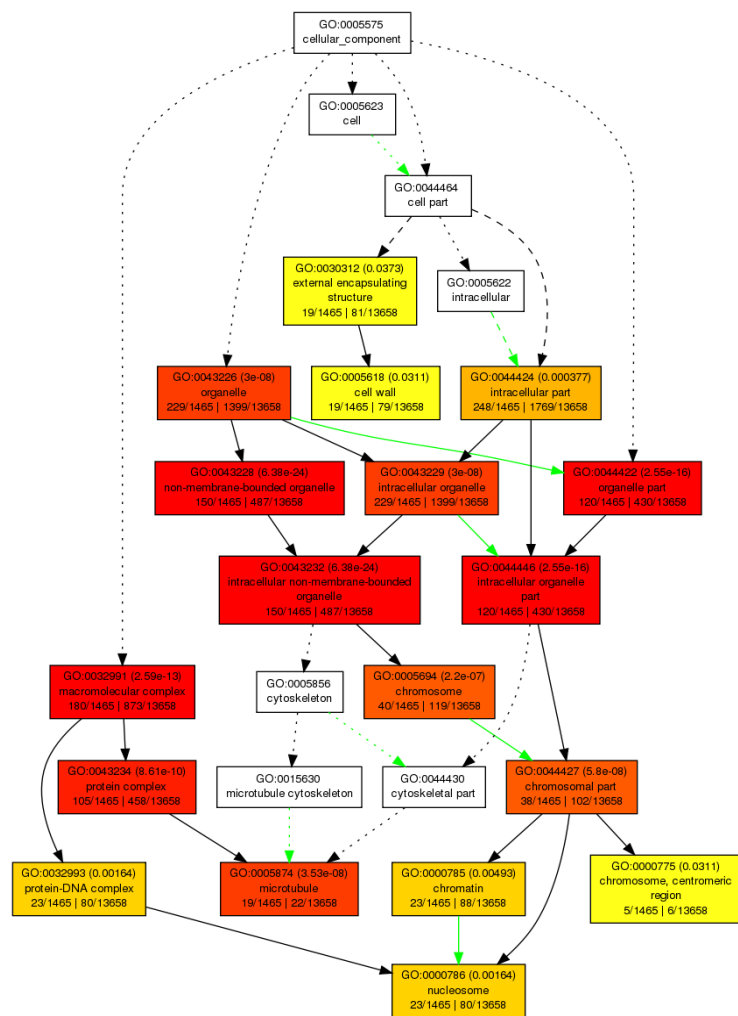

Figure S5. (B) Division “Cellular Component”, Downregulated GO terms



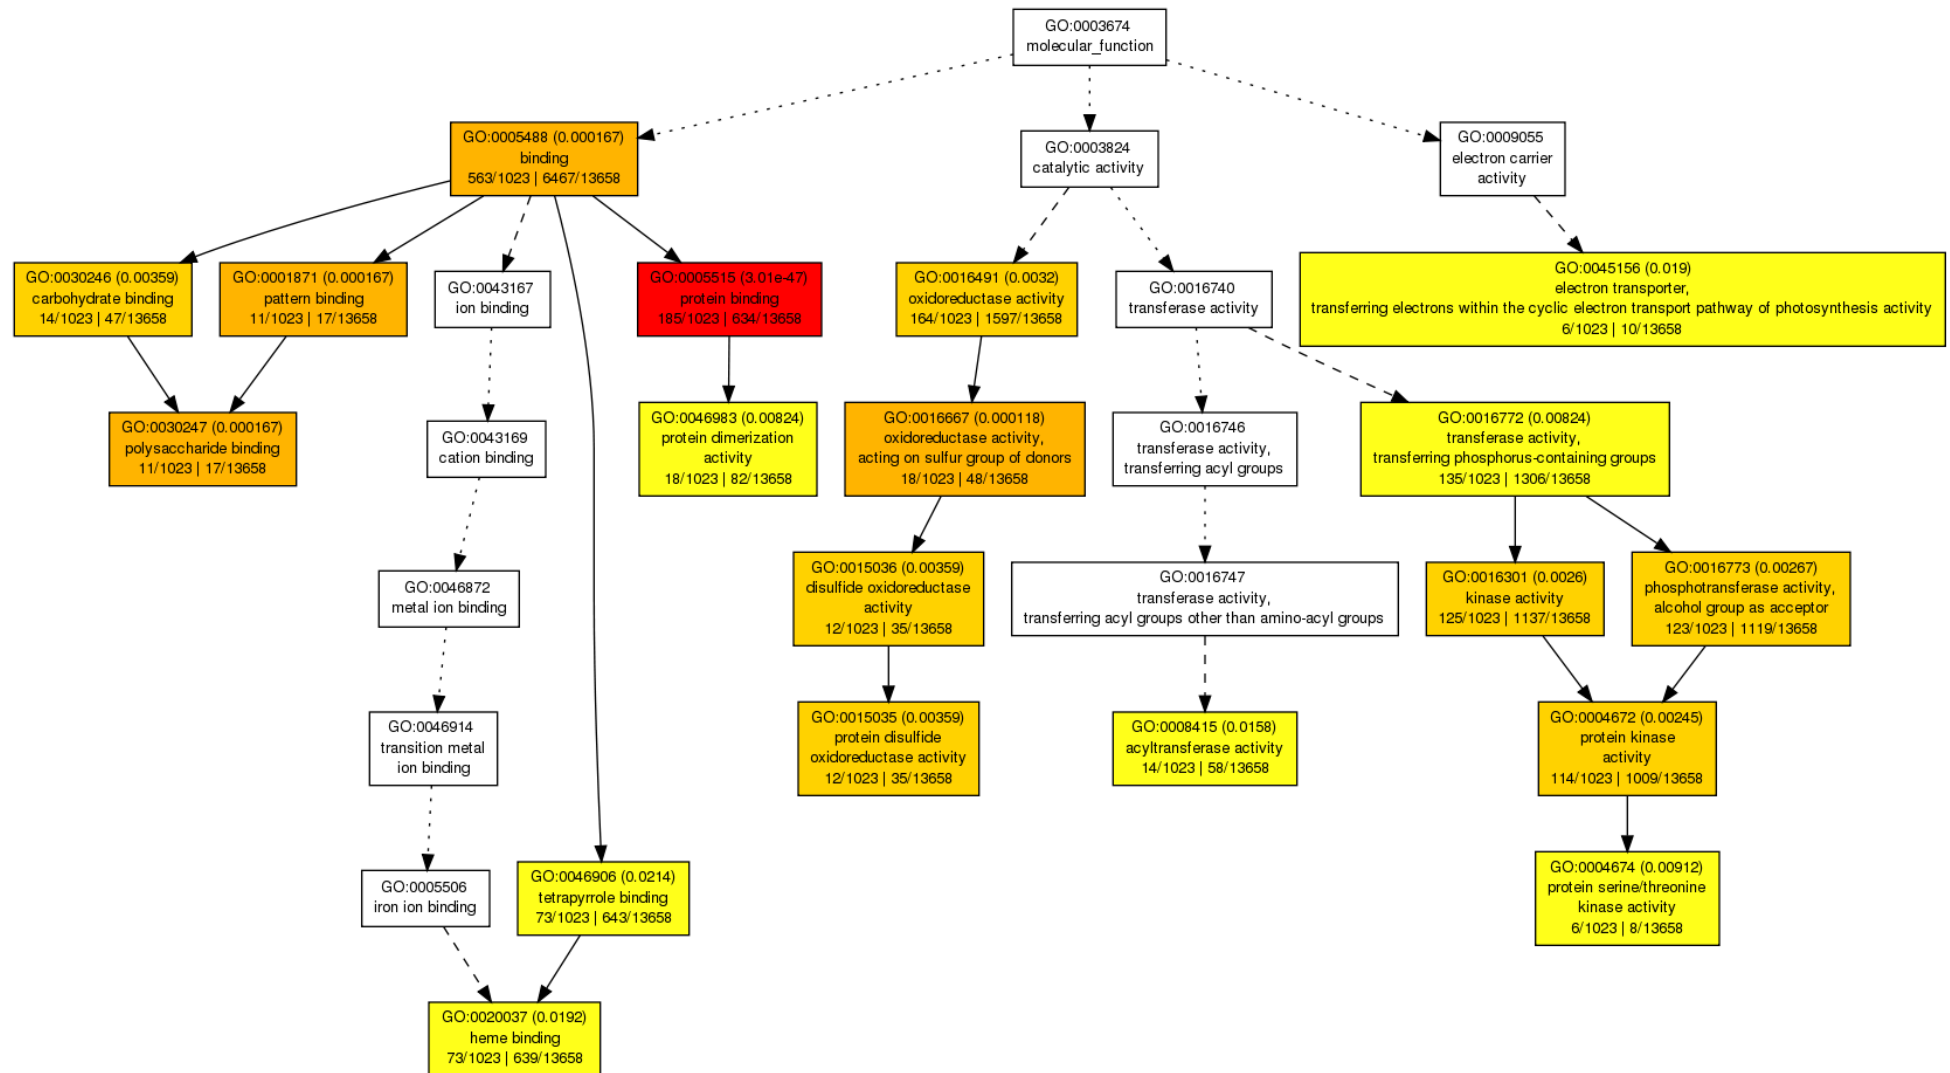

Figure S5. (D) Division “Molecular Function”, upregulated GO terms
