# Supplementary material
Source: MDPI journal article supplement (https://www.mdpi.com/2073-4395/13/3/684)
Supplement: s1 [file s1]

**Table S3. Heterogeneity of variants of the potato spindle tuber viroid strain NicTr-3.**

| Clones | Mutations in variants of the NicTr-3 strain compared to the reference sequence* |      |      |       |       |       |       |       |       |       |       |       |  |       |       |       |       |
|--------|---------------------------------------------------------------------------------|------|------|-------|-------|-------|-------|-------|-------|-------|-------|-------|--|-------|-------|-------|-------|
| v1**   |                                                                                 |      | C67G |       | C120U |       |       |       |       |       | C214U | C226T |  |       |       |       |       |
| v2**   |                                                                                 |      |      | 117+A | C120A |       |       |       |       |       |       |       |  |       |       | A309_ |       |
| v3**   |                                                                                 |      | C67G |       | C120U |       |       |       |       |       |       |       |  | C285U |       | A309_ | A324G |
| v4**   |                                                                                 |      | C67G |       | C120U | A125G |       |       |       |       |       |       |  |       |       | A309U |       |
| v5     |                                                                                 |      | C67G |       |       |       |       | T177A |       |       |       |       |  |       |       |       |       |
| v6     |                                                                                 |      | C67G |       |       |       | 126+A |       |       |       |       |       |  |       |       |       |       |
| v7     | G16A                                                                            |      |      |       |       |       |       | T177A |       | T208C |       |       |  | T238C |       |       |       |
| v8     |                                                                                 | C66_ |      |       |       |       |       |       | T190C |       |       |       |  |       |       |       |       |
| v9     |                                                                                 |      |      |       |       |       |       |       |       |       |       |       |  |       | T307C |       | T330C |

\*«\_» – deletion, «+» – insertion.

\*\* Data from paper Mironenko et al., 2022 (in press)[25]
