# Supplementary material
Source: MDPI journal article supplement (https://www.mdpi.com/2073-4395/13/3/684)
Supplement: s1 [file s1]

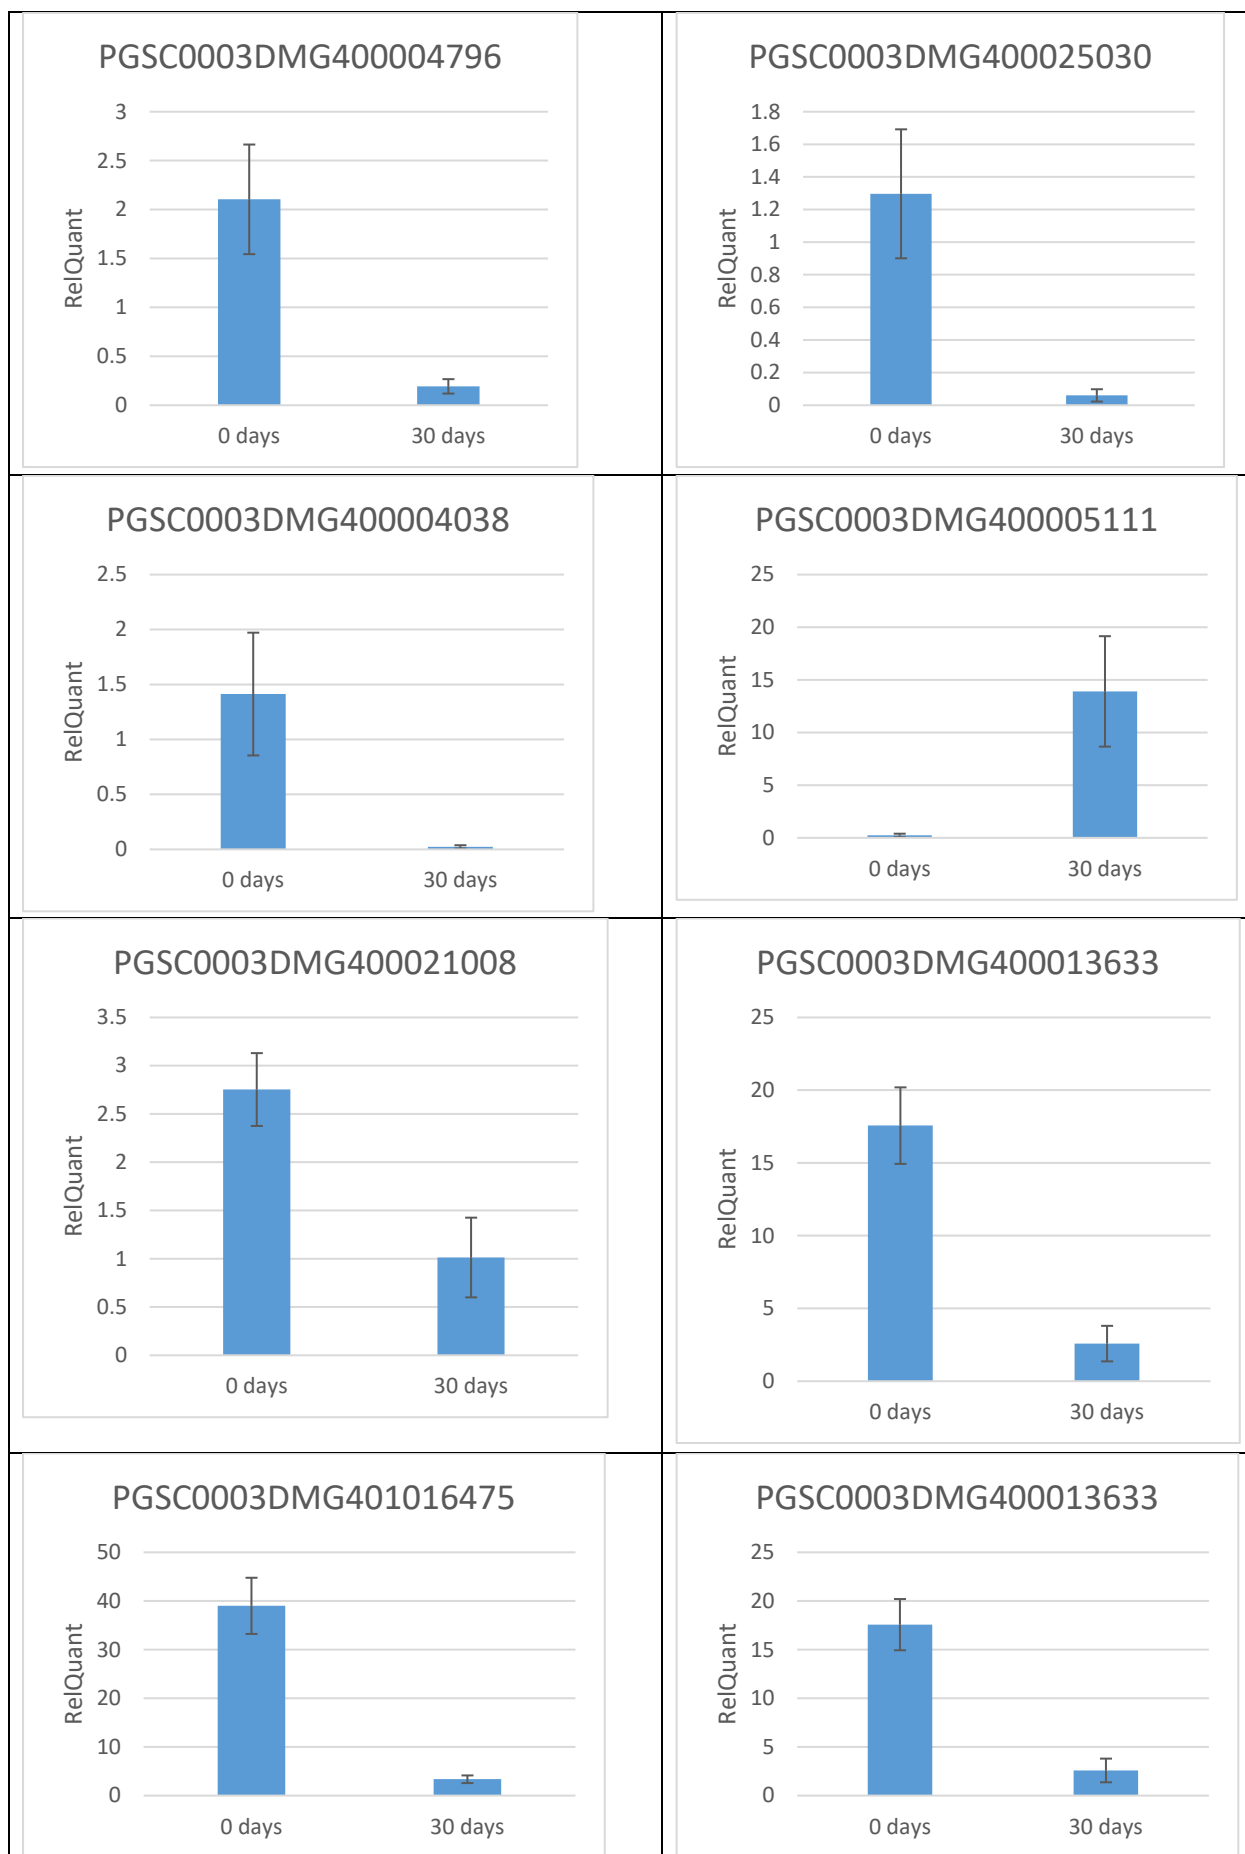

Figure S1. Verification of significant difference of DEGs by qPCR (see Table S1 for primers description).
