# Supplementary material
Source: MDPI journal article supplement (https://www.mdpi.com/2073-4395/13/3/684)
Supplement: s1 [file s1]

Supplementary Table S2. Tubers and haulm weight at 90 dpi with PSTVd strain NicTr-3 (first inoculation and second generation) and mock.

| Plants number     | The first inoculation by PSTVd (90 dpi) and mock |      |                             |       |                |                                         | The second generation from PSTVd-infected tubers (90 dpi) and mock |      |                             |       |                                              |                  |
|-------------------|--------------------------------------------------|------|-----------------------------|-------|----------------|-----------------------------------------|--------------------------------------------------------------------|------|-----------------------------|-------|----------------------------------------------|------------------|
|                   | The number of tubers                             |      | Tubers weight per one plant |       | Haulm weight   |                                         | The number of tubers                                               |      | Tubers weight per one plant |       | Haulm weight                                 |                  |
|                   | PSTVd                                            | Mock | PSTVd                       | Mock  | PSTVd          | Mock beginning of leaf desiccation (LD) | PSTVd                                                              | Mock | PSTVd                       | Mock  | PSTVd                                        | Mock             |
| 1PSTVd/<br>1mock  | 6                                                | 5    | 33.9                        | 88.8  | 146.3<br>green | 91.3                                    | 3                                                                  | 3    | 52.4                        | 104.2 | 103.0<br>1 green/1 LD/1 plant did not sprout | 83.8<br>3 LD     |
| 2PSTVd/<br>2mock  | 3                                                | 5    | 135.3                       | 167.7 | 144.3<br>green | 110.8                                   | 3                                                                  | 2    | 125.3                       | 122.3 | 140.9<br>2 green/1 LD                        | 139.8<br>3 green |
| 3PsSTVd/<br>3mock | 9                                                | 9    | 168.9                       | 174.2 | 174.3<br>green | 89.5                                    | 0                                                                  | 1    | 86.8                        | 141.3 | 110.1 2 green/1 LD                           | 113.3<br>3 green |
| Mean              | 6                                                | 6.3  | 112.7                       | 143.6 | 155.0          | 97.2                                    | 2                                                                  | 2    | 88.1                        | 122.6 | 118.0                                        | 112.3            |
